# Supplementary material
Source: PubMed Central journal article supplement (PMC9365889)
Supplement: NIHMS1772659-supplement-Supp2.pdf [file NIHMS1772659-supplement-Supp2.pdf]

## 1 **Supplemental File:**

### 2 Case history

3           The decedent was a male born via vaginal delivery at 36.1 weeks of gestation to a 34-year-  
4 old woman, G3, P3, A1 (Gravida, para, abortus). He was conceived through in vitro fertilization  
5 with a sperm donor. He was born as a monochorionic, diamniotic twin. Ultrasound at the third  
6 trimester indicated the presence of slight microcephaly and smaller cerebellum which raised some  
7 concerns. He weighed 2.4 kg (0% Percentile, Z score -7.37), length of 43 cm (4<sup>th</sup> Percentile, Z  
8 score -1.71) and head circumference of 30 cm (4<sup>th</sup> percentile, Z score-1.79). The Apgar scores at  
9 1 and 5 minutes after birth were recorded as 8 and 9. The decedent was discharged from the hospital  
10 2 days after birth. At home he became apneic with hypoventilation and was readmitted to a hospital  
11 4 days later. Despite positive airway pressure ventilation, the apneic spells continued which led to  
12 neurological and genetic investigations. He was then diagnosed with microcephaly and  
13 pontocerebellar hypoplasia with de novo CASK mutation. He displayed poor feeding, profound  
14 hypotonia, microcephaly, micrognathia, bilateral clubfoot, and vertical chordee with penile  
15 torsion. Oral-pharyngeal motility studies revealed mild to moderate oral motor dysphagia; there  
16 were episodes of silent aspirations with very limited reflux. A gastrostomy tube placement was  
17 performed. Fluctuations in body temperature with hypothermia and heart rate were also noted.  
18 Within 3 weeks after his birth, torso flexions were noted occurring 2-3 times a day. He also  
19 displayed tics in the hands, feet and neck which lasted for several seconds to several minutes. The  
20 decedent developed irritability and intolerance to feeds, hypothermia and acute respiratory failure  
21 with apnea. A surface, 25-channel video electroencephalography (vEEG) was performed using an  
22 international 10-20 system. A diagnosis of Ohtahara syndrome was established due to the presence  
23 of a typical burst suppression pattern. The heart rate varied between 90 and 150 beats per minute  
24 and displayed a sinus rhythm (Supplemental Figure 1). He was started on levetiracetam and a

25 ketogenic diet. The ketogenic diet seemed to impact the seizures adversely. Possibility of long-  
26 term palliative care including tracheostomy was discussed, but a decision was made against  
27 aggressive continued therapy. He passed away 2 months and 6 days after birth. The autopsy was  
28 conducted and the report prepared by an experienced pathologist (Julia Hegert) with aid from  
29 neuropathologists.

### 30 EEG Spectral Analysis

31 Raw data were trimmed for artifacts by a trained observer in the clinic. Data were analyzed  
32 in MATLAB 2017a using the EEGLab toolbox. After filtering from 0.01-50Hz, bad channels were  
33 removed based on spectral power. Spectral power was plotted for each channel independently  
34 using the spectopo() function with a window length of 256 samples, FFT length of 256, and 0  
35 overlap in the entire 0.01-50Hz frequency band. Channels covering each of a given lobe (frontal,  
36 parietal, temporal, occipital, central) were then grouped and mean power spectral density was  
37 calculated within each biologically relevant frequency band: delta, alpha, beta, theta, and low  
38 gamma.

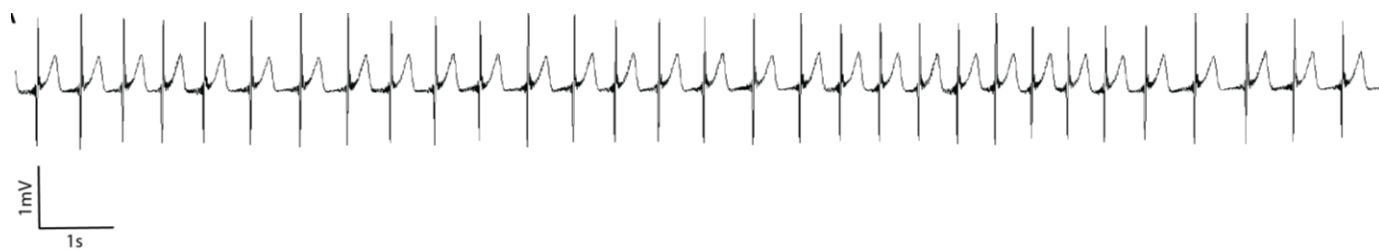

39  
40 Supplemental Figure 1. (A) Representative 20 second electrocardiogram trace (precordial chest  
41 lead) demonstrating a sinus rhythm.

42

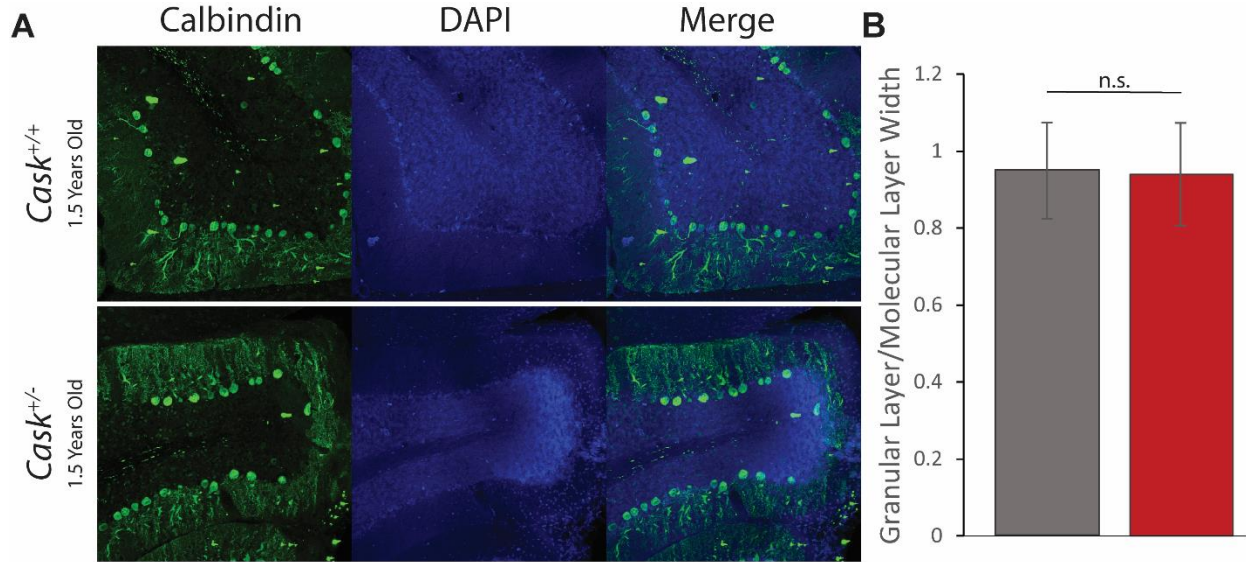

43  
 44 Supplemental Figure 2. (A) Representative images of cerebella from *Cask*<sup>+/-</sup> mice (bottom) and  
 45 *Cask*<sup>+/+</sup> littermate control mice (top) aged up to 2 years. (B) Quantification of the ratio of the  
 46 width of the granular layer over the molecular layer demonstrating no diminishment of granular  
 47 layer width in the heterozygous absence of CASK even at extremely advanced ages. N=3 mice  
 48 for each genotype.

49

50

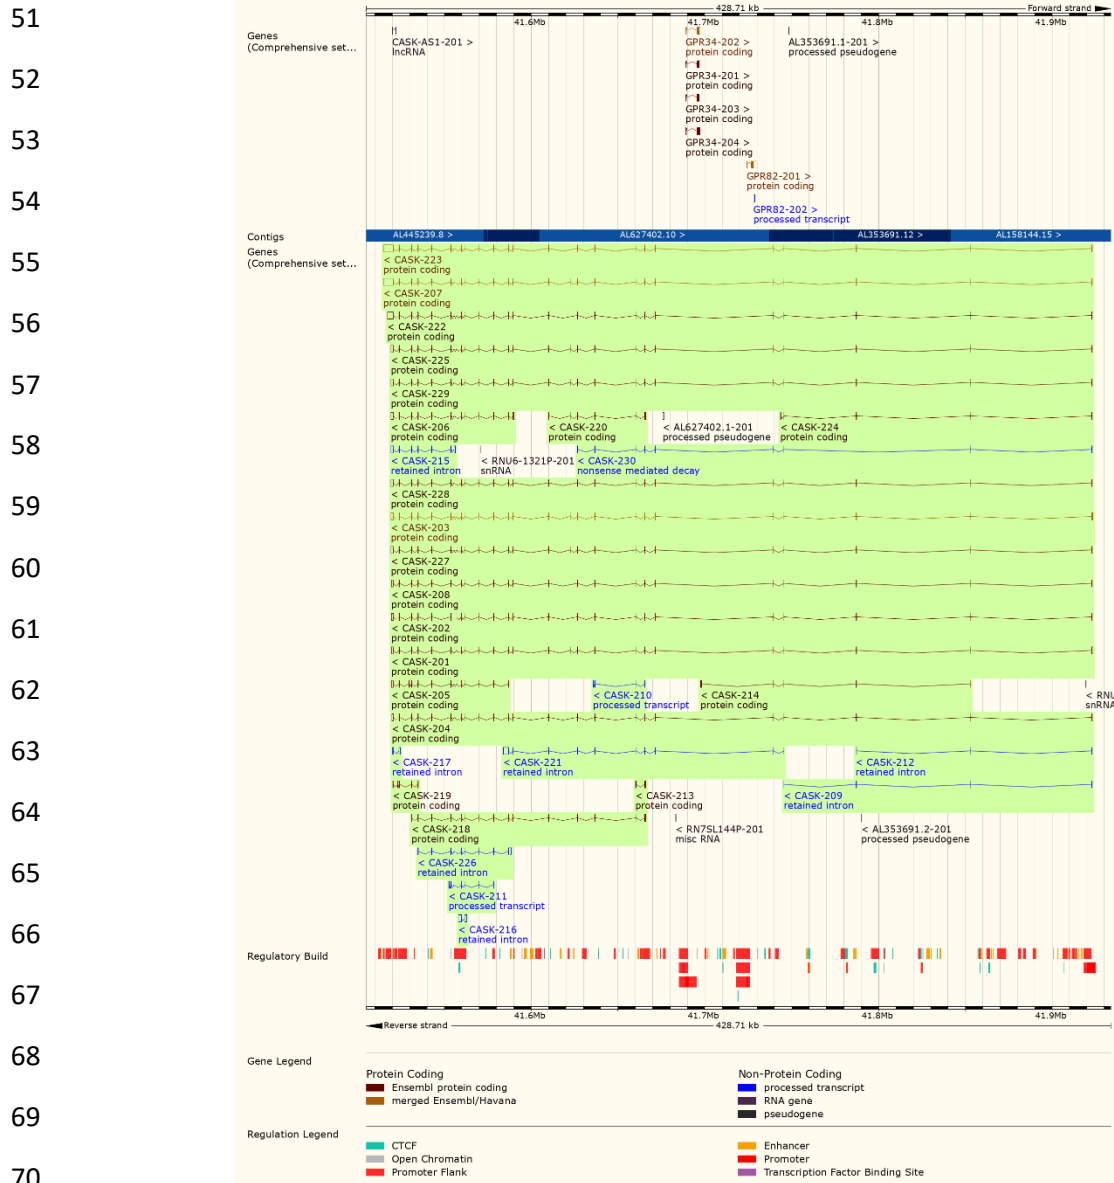

73 Supplemental Figure 3. NCBI summary of human *CASK* gene (top) and known splice variants  
74 (bottom). All functional transcripts include the second exon.

75  
76  
77  
78  
79

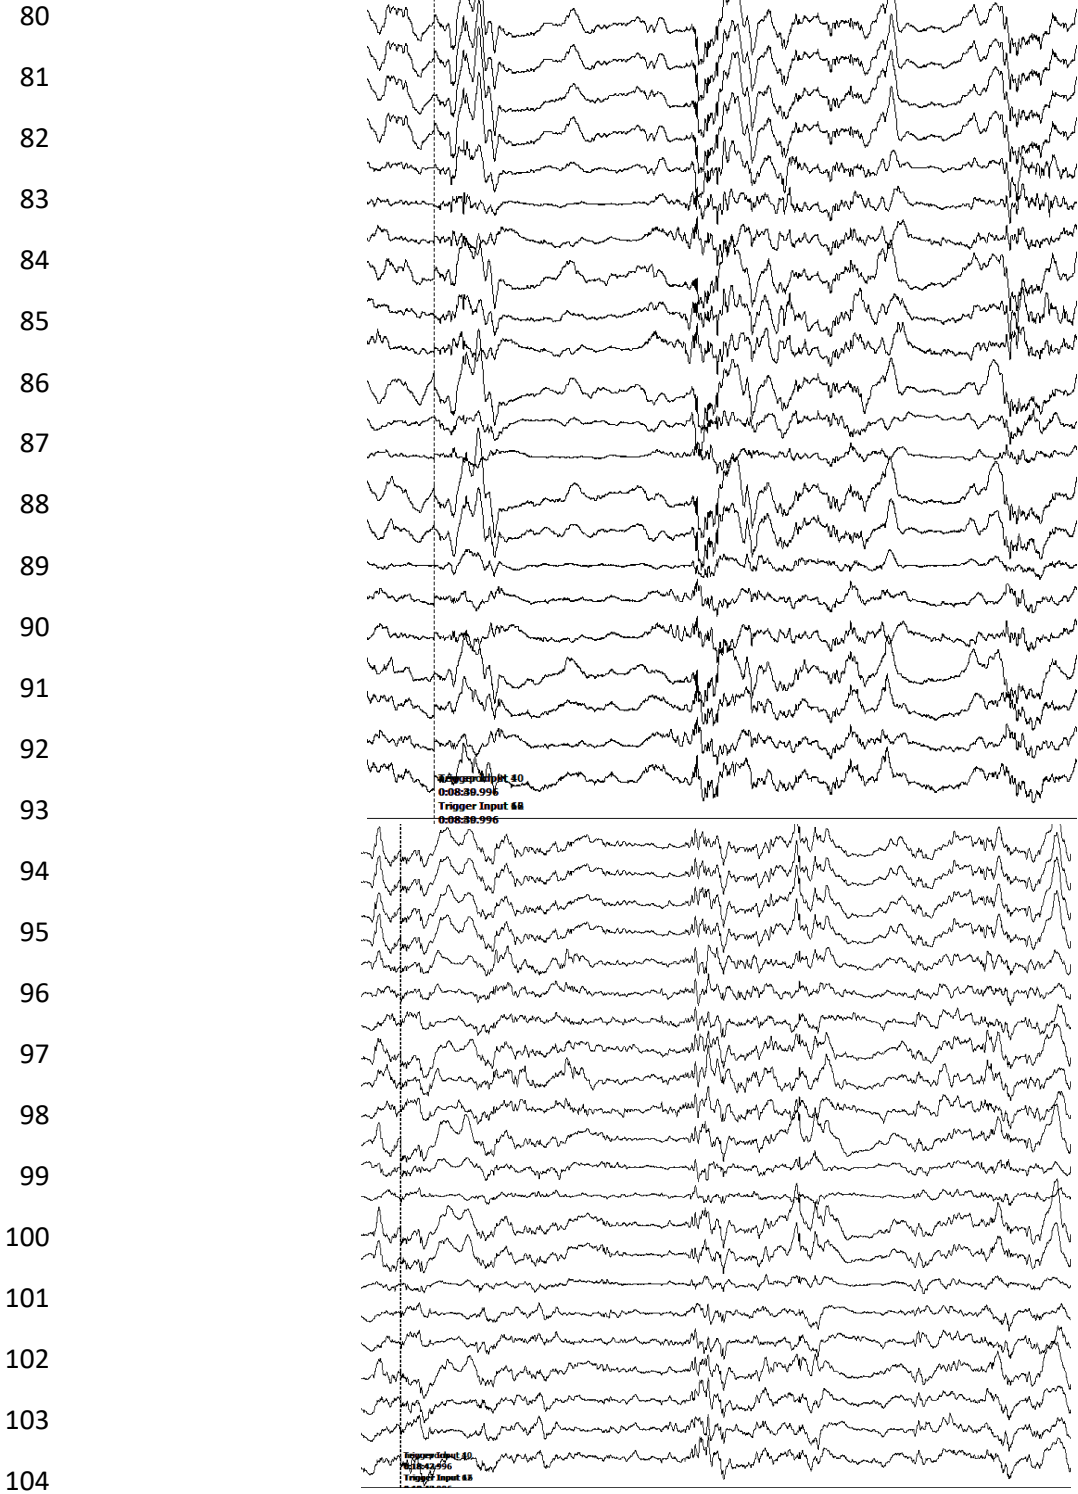

105  
106

107 Supplemental Figure 4. Examples of burst-suppression pattern in EEG recordings.

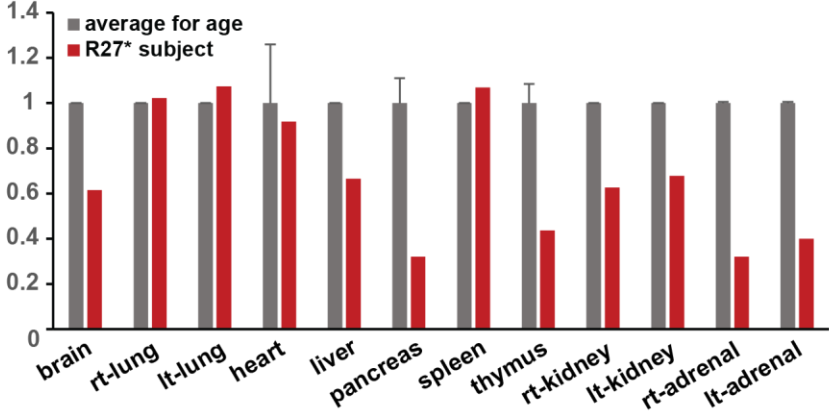

108

109 Supplemental Figure 5. Organ weights of the decedent compared to average respective organ  
110 weight for the age.

111

A

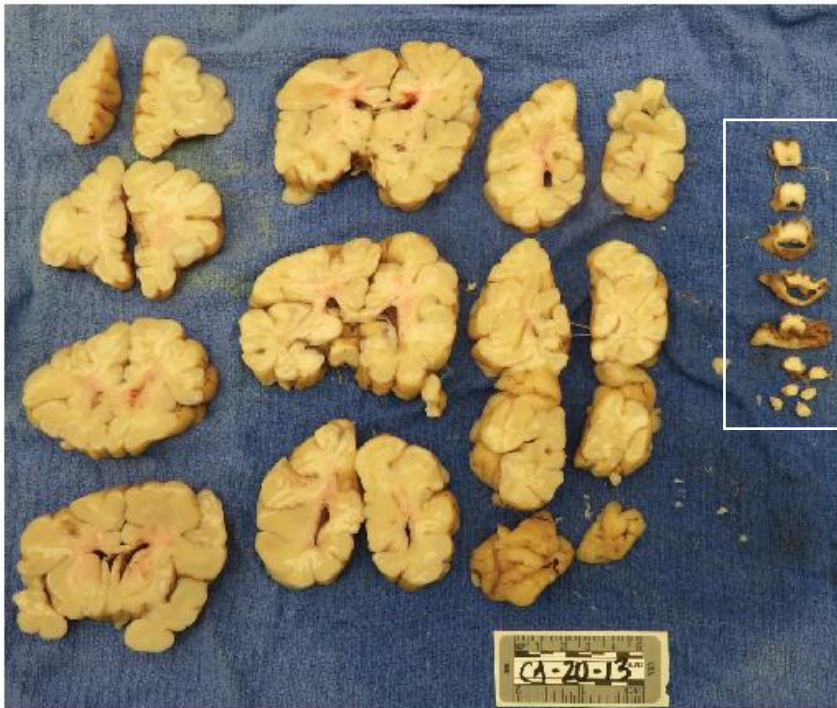

B

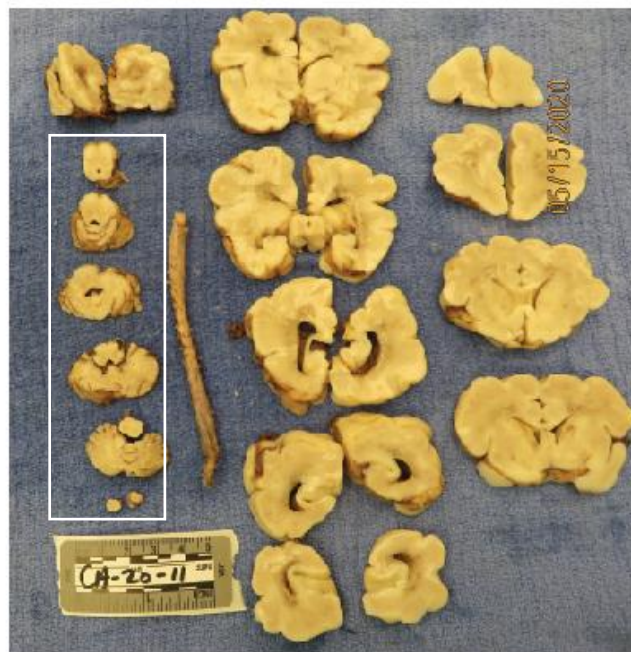

112

113 Supplemental Figure 6. Macroscopic view of 1 inch coronal slices of brain from (A) *CASK*  
 114 R27Ter subject (2 months) (B) a child who died of non-neurological cause (40 days old). Note  
 115 the disproportionate cerebellar and brain stem hypoplasia (white box). The grey and white  
 116 matter configuration remains normal in *CASK* R27Ter subject. White matter tracts are  
 117 unremarkable.

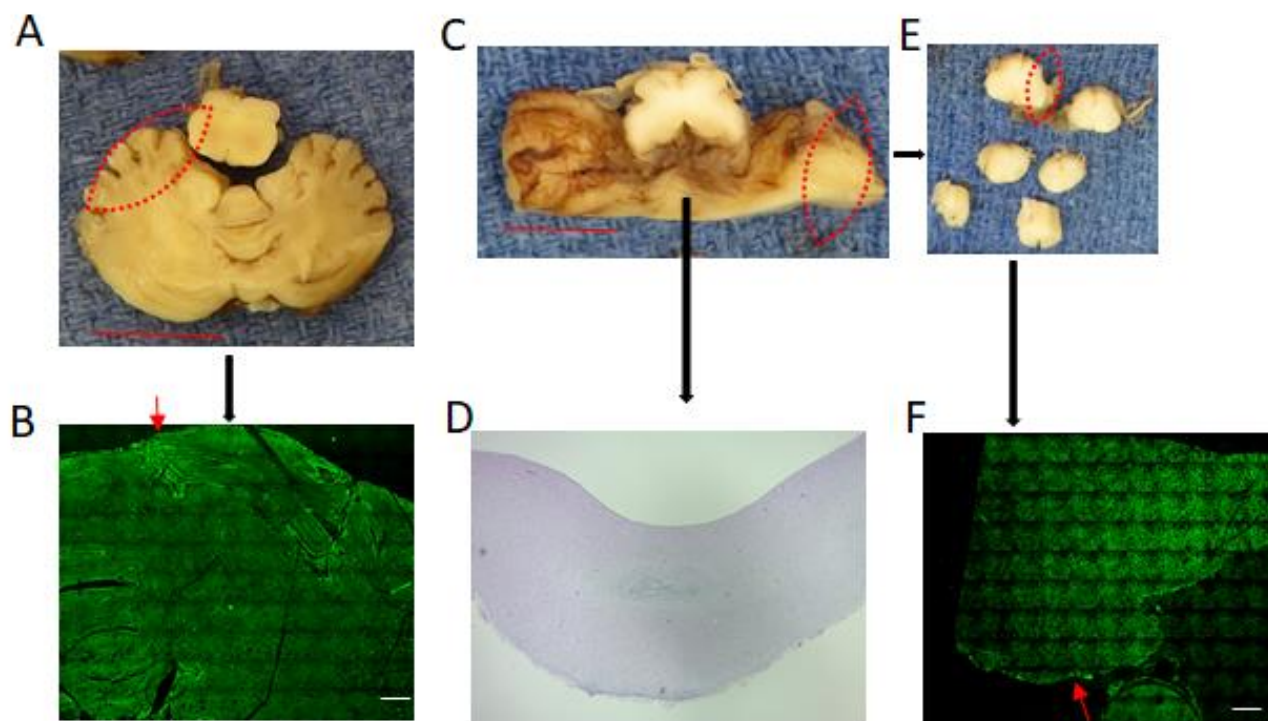

118

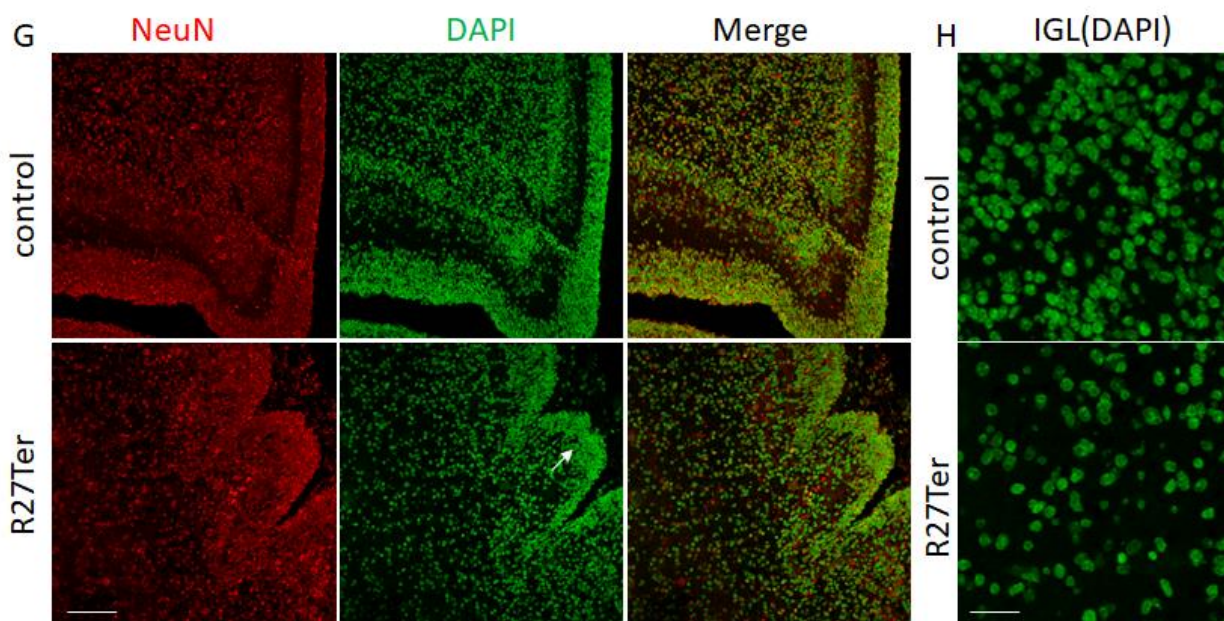

119

120 Supplemental Figure 7. A) Transverse section of cerebellum from the control case (white box  
 121 supplemental Figure 6B). Scale bar =1cm. B) DAPI staining from a wide region of cerebellum  
 122 from the indicated red circled region in A. Note the visibility of EGL and IGL at the edges (red  
 123 arrow). Scale bar= 1mm. C) A similar transverse section from the boy with CASK R27\* mutation  
 124 showing nearly negligible thickness with a very rudimentary vermis. Scale bar= 1 cm. D)  
 125 Hematoxylin-eosin staining of base of dilated 4<sup>th</sup> ventricle along with rudimentary vermis (2X).  
 126 E) Sections from the lateral edge of the cerebellar hemisphere circled in red in C. F) DAPI staining



127 from a wide region of cerebellum from the indicated red circled region in E. Note thinning of EGL  
128 and yet no formation of IGL throughout the area (red arrow). Scale bar =1mm. G) Panels showing  
129 NeuN and DAPI labeling of control and R27Ter cerebellum as indicated, scale bar= 50 $\mu$ m. The  
130 white arrow indicates migrating granule cells in R27Ter. H) Magnified images of IGL from control  
131 and R27Ter cerebellum showing a highly depleted IGL in R27Ter cerebellum. Scale bar= 20 $\mu$ m.

132

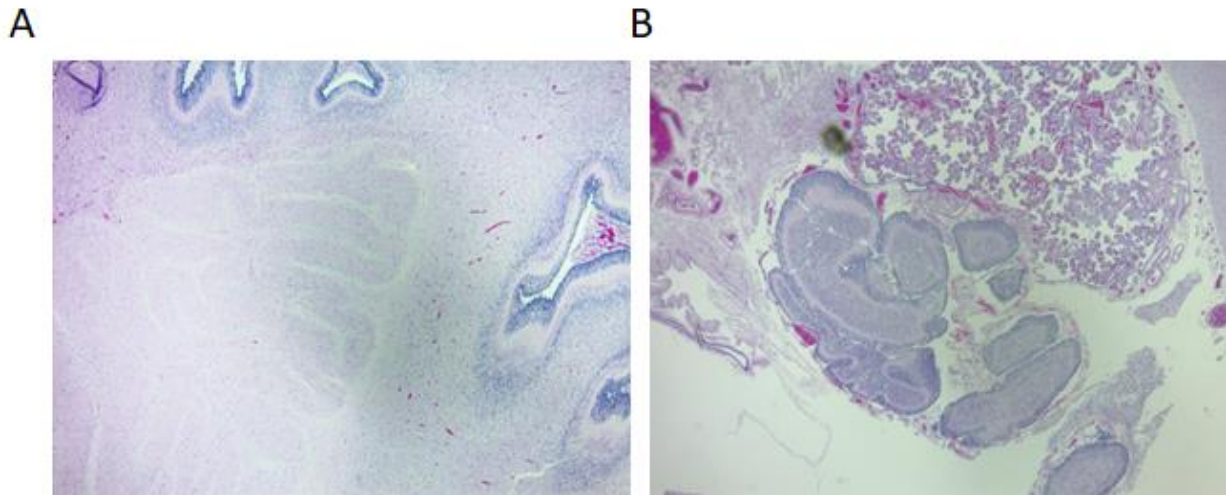

133

134

135 Supplemental Figure 8. A) Dentate nucleus shown from the control cerebellum, which is well  
136 formed (2X). B) Not much tissue remains at the region of the deep cerebellar nuclei in the boy  
137 with CASK R27\* mutation. Complete absence of dentate nucleus is noted (2X).

138

139

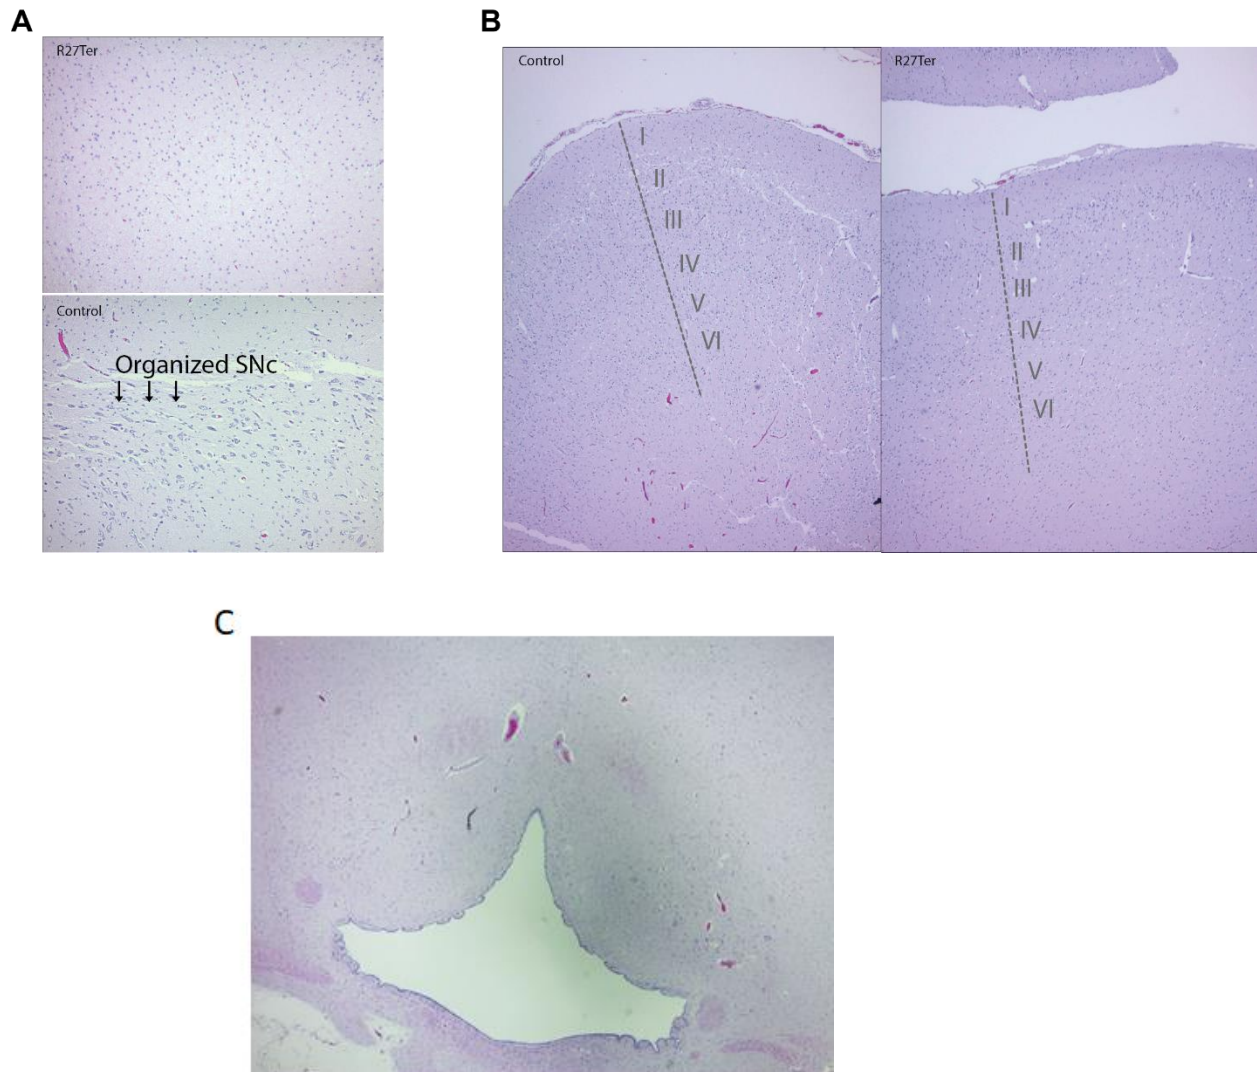

140

141

142

143

144

145

146

147

148

149

150 Supplemental Figure 9. Hematoxylin and eosin staining of the substantia nigra pars compacta  
 151 (SNc) (A) and cerebral cortex (B) of the decedent and control. Note in (A) the absence of an  
 152 organized SNc in the R27Ter subject which has cells with pink cytoplasm (astrocytes) but no  
 153 neurons, large ordered blue-stained cells (neurons) are observed in the control. Note also the  
 154 presence of a properly laminated cerebral cortex containing all six canonical layers. C) 2X  
 155 section from the pons of the boy with R27\* mutation. Note the presence of locus coeruleus.

156

157

158

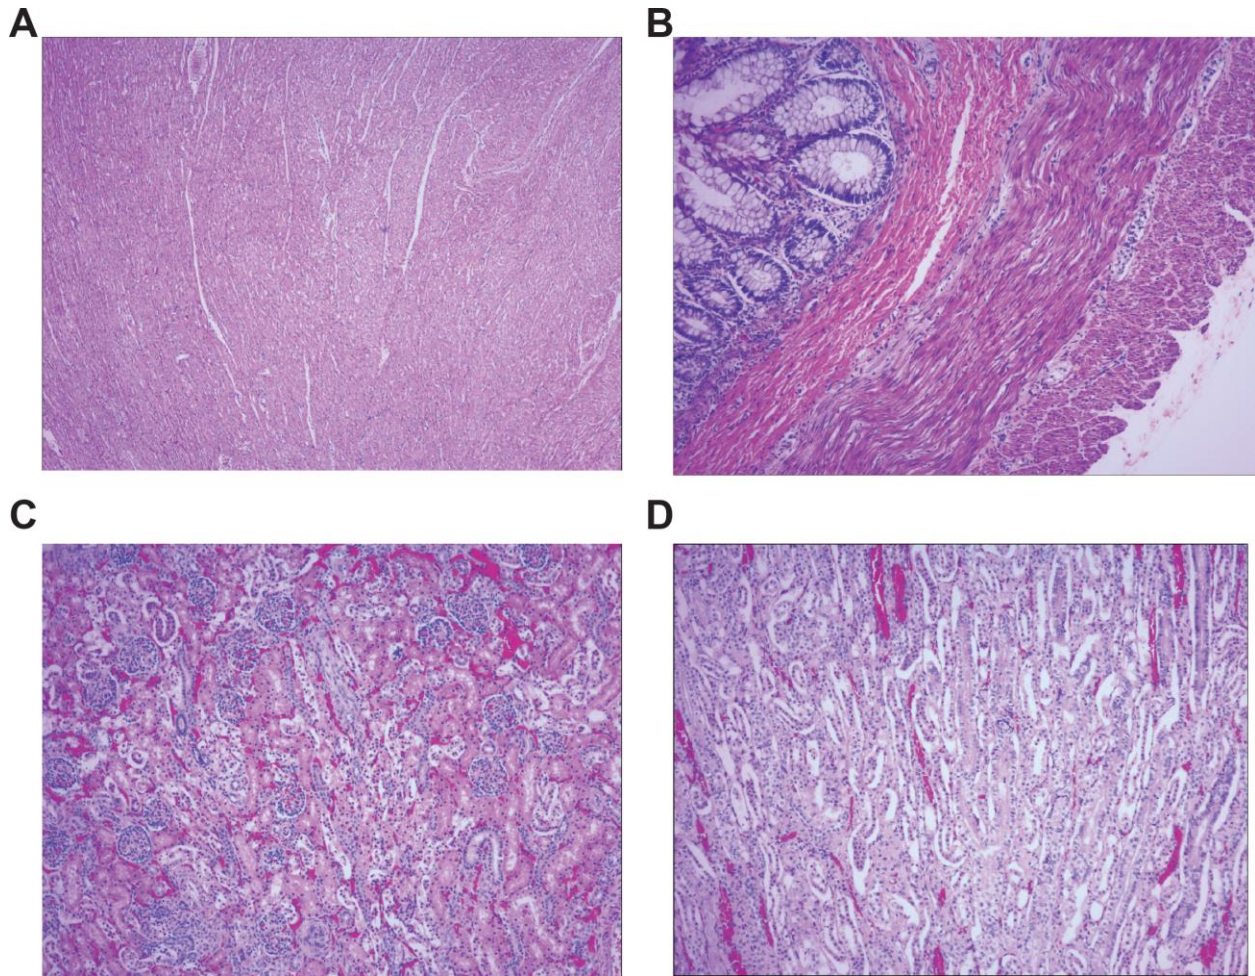

159

160 Supplemental Figure 10. Hematoxylin and eosin stain of (A) heart showing uniformly layered  
161 myofibers with no obvious pathology (4X), (B) rectum showing mucosal, submucosal,  
162 muscularis externa and serosal layers, neuronal plexuses are visible with no obvious pathology  
163 (10X), (C) renal cortex and (D) renal medulla showing normal glomeruli formation and renal  
164 tubules (10X).

165

166

167

168

169

170

171

172

173

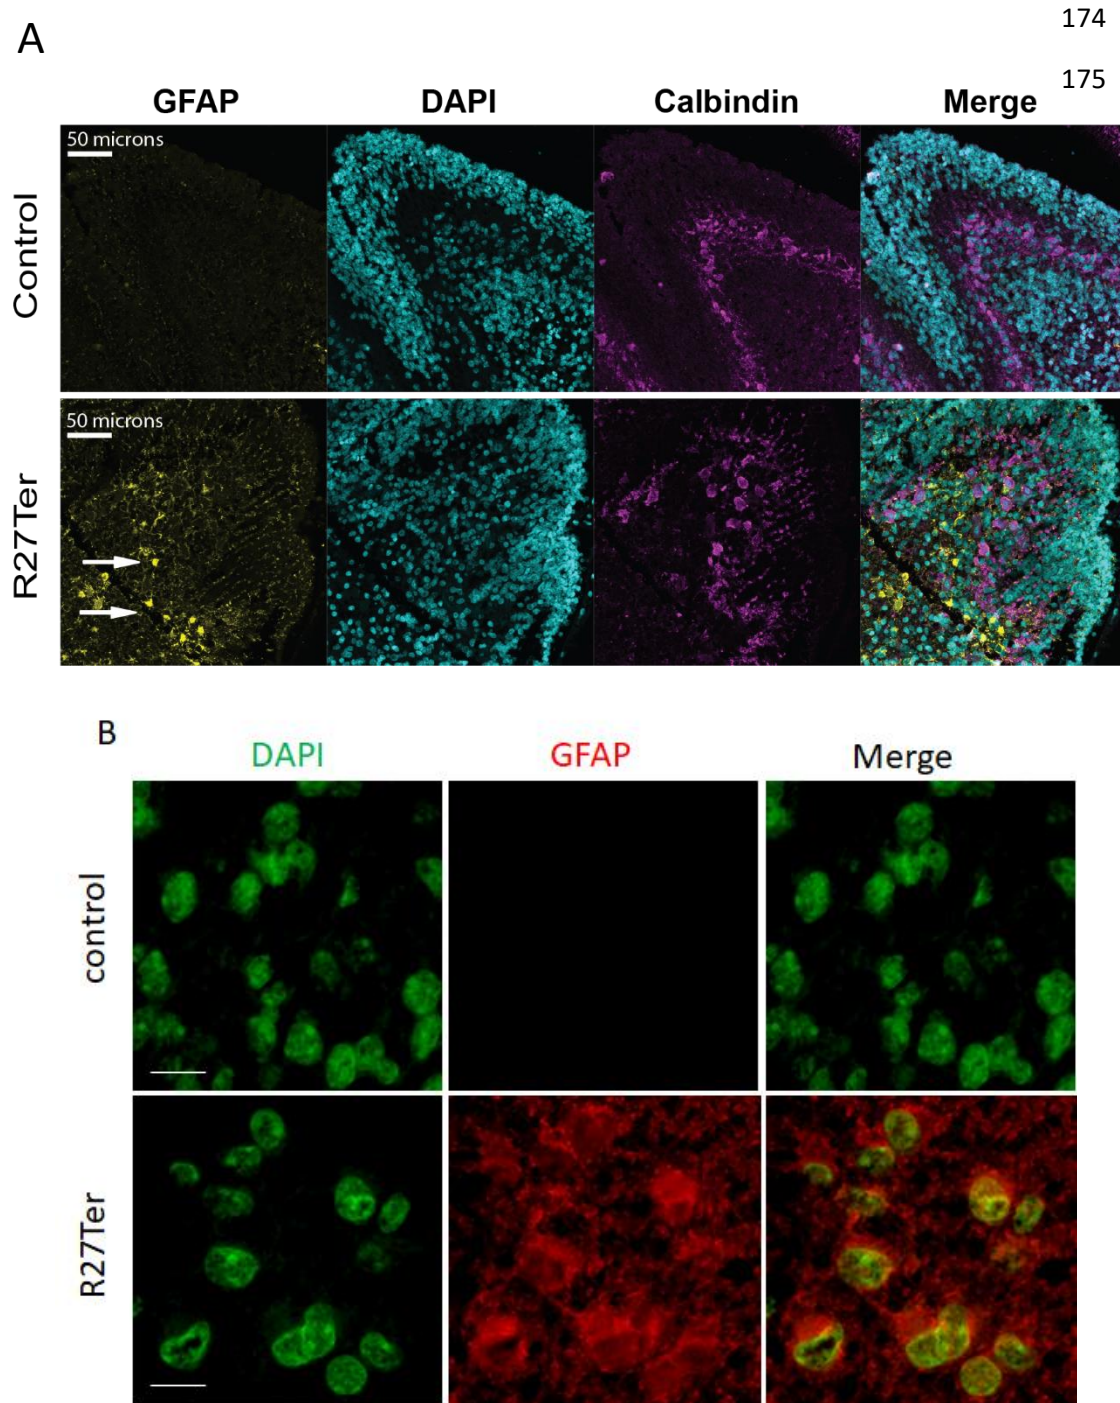

181 Supplemental Figure 11. A) Calbindin and GFAP immunostaining of the R27Ter (bottom) and  
 182 control (top) subjects. Note the presence of properly aligned Purkinje cells in the R27Ter subject  
 183 as indicated by calbindin immunoreactivity as well as the substantially increased GFAP  
 184 immunoreactivity in the R27Ter subject relative to the control (astrocytic cells are indicated with  
 185 white arrows). B) High magnification images of IGL from control and R27Ter cerebellum  
 186 showing GFAP positive cells in R27Ter IGL. Scale bar = 10  $\mu$ m.

187

188

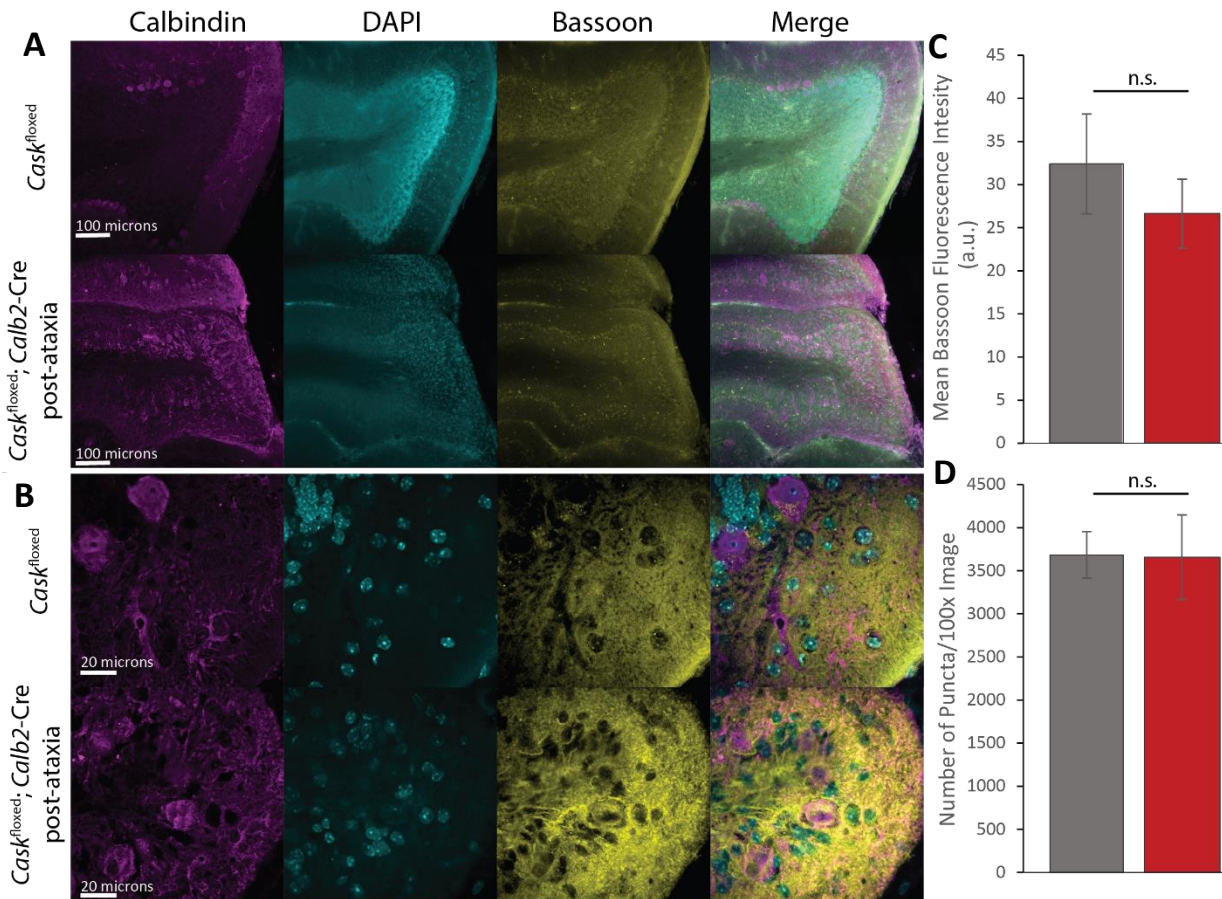

189 Supplemental Figure 12. (A) Representative 20x images of the anterior cerebellar folia in  
 190 *Cask*<sup>floxed</sup>; *Calb2-Cre* post-ataxia plateau (bottom) and age-matched *Cask*<sup>floxed</sup> controls (top)  
 191 immunostained for calbindin to label Purkinje cells, DAPI to label nuclei, and bassoon to label  
 192 synapses. (B) Quantification of bassoon staining intensity indicates no difference in fluores-  
 193 cence intensity between groups. (C) Representative 100x images of *Cask*<sup>floxed</sup>; *Calb2-Cre* post-ataxia  
 194 plateau (bottom) and age-matched *Cask*<sup>floxed</sup> controls (top). (D) Quantification of the number of  
 195 bassoon positive puncta per 100x image quantified automatically using SynQuant (Wang et al.  
 196 2020) indicating no difference between groups. N=3 *Cask*<sup>floxed</sup> and 4 *Cask*<sup>floxed</sup>; *Calb2-Cre* for (H-  
 197 K); bars in all panels indicate mean±SEM. \* indicates  $p < 0.05$  using a two-tailed Student's t-  
 198 test.

199

200

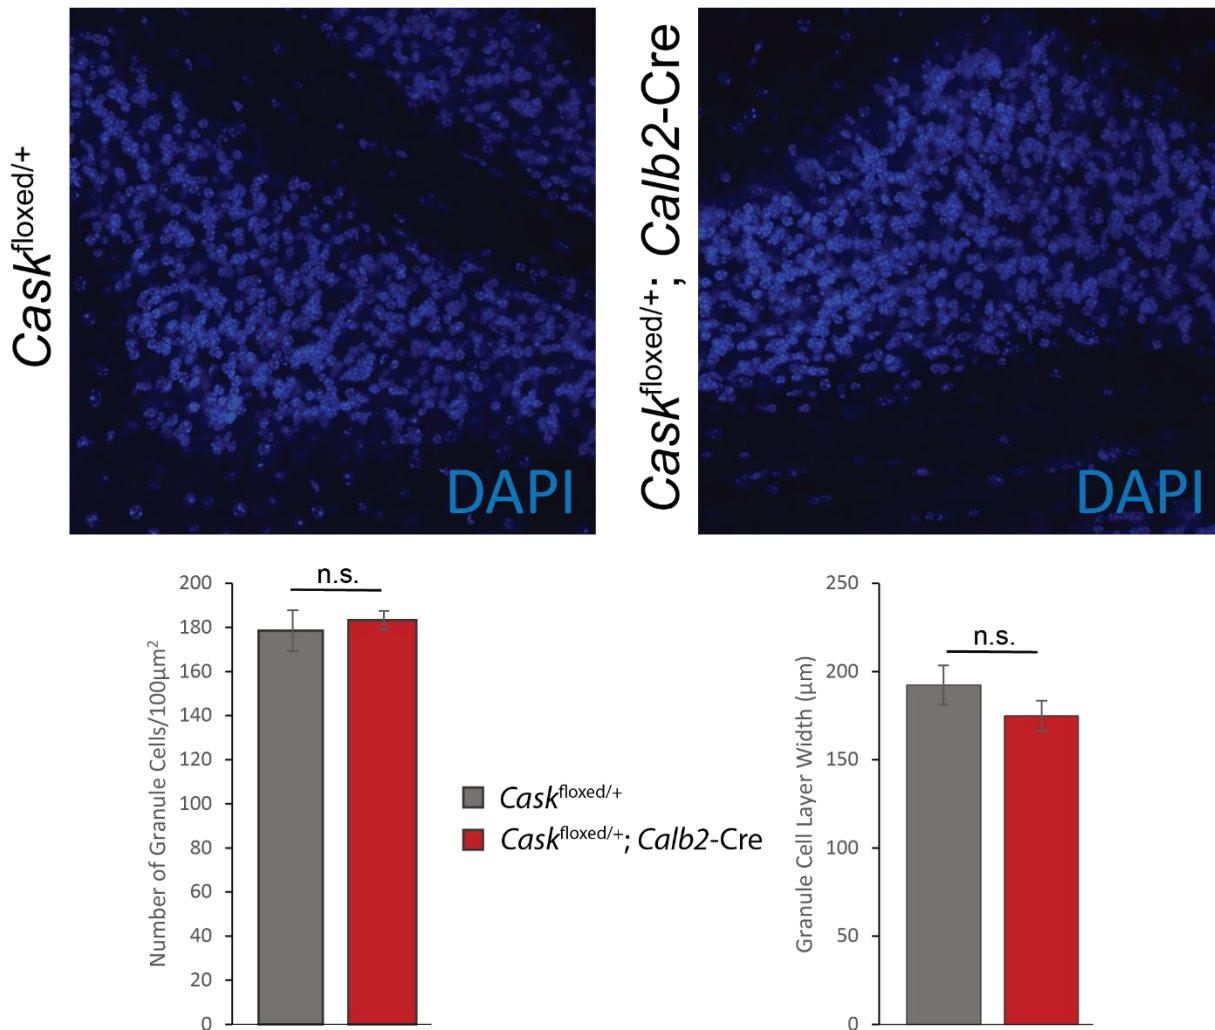

201 Supplemental Figure 13. Fluorescent images of nuclei in the granule cell layer for *Cask*<sup>floxed/+</sup>  
 202 control mice (left) and *Cask*<sup>floxed/+</sup>; *Calb2-Cre* heterozygous cerebellar knockout mice (right)  
 203 aged over 1 year. Quantification of DAPI+ nuclei density (left) and granular layer width (right)  
 204 demonstrating no degenerative cell death or thinning of the granular layer compared to control in  
 205 the heterozygous knockout; n=4 mice in each genotype.

#### 206 Supplemental video

207 Video depicts a P100 *Cask*<sup>floxed/+</sup>; *Calb2-Cre* mice unable to take a single step without falling over.  
 208 The mouse is otherwise healthy and can survive with food and water on the cage floor. Note, the  
 209 righting reflex seems to be intact.
